# Supplementary material for: Suspended Particulate Matter drives the spatial segregation ofnitrogen turnover along the hyper-turbid Ems estuary
Source: Copernicus journal article supplement (doi:10.5194/bg-2021-321), 2021-12-02
Supplement: Supplementary file 1 [file bg-2021-321-supplement.zip]

## Sheet: 2014_Transect
Date	Time	Sample ID	Ems-km	Longitude	Latitude	Salinity	Temperature_°C	Optode-Oxygen_µmol/l	Oxygen-Saturation_%	no3_umol/L	nh4_umol/L	no2_umol/L	ẟ15N-NO3_‰	sd: ẟ15N-NO3_‰	ẟ18O-NO3_‰	sd: ẟ18O-NO3_‰	SPM_mg/L	N_%	C_%	C/N	C_mg/L	C_umol/L	N_mg/L	N_umol/L	ẟ15N-SPM_‰
2014-08-05	08:35:00	274	98.407	6.60976	53.6884	31.47	22	281.98	124.182	3.9	5.4	0.6	11.317	0.107	6.642	0.099	29.57	0.22	2.58	13.6818	0.762906	63.5755	0.065054	4.64671	NA
2014-08-05	10:27:00	275	87.53	6.68482	53.5502	28.87	23.17	264.88	117.343	23.3	7.3	2.9	14.254	0.148	5.497	0.067	42.9	0.27	3.05	13.179	1.30845	109.037	0.11583	8.27357	7.998
2014-08-05	11:41:00	276	63.41	6.93544	53.4109	22.51	24.82	262.96	115.654	56.2	3.6	3.3	18.316	0.04	7.484	0.213	184.62	0.29	3.4	13.6782	6.27708	523.09	0.535398	38.2427	8.417
2014-08-06	06:38:00	277	51.509	7.021	53.3202	22.05	22.79	247.04	104.493	56.4	2.3	2.9	18.799	0.138	7.442	0.042	54.35	0.2	2.59	15.1083	1.40766	117.305	0.1087	7.76429	NA
2014-08-06	08:19:00	278	34.82	7.26771	53.3223	9.54	22.98	134.23	52.9997	96.4	0.5	0.6	22.306	0.085	10.537	0.275	153	0.14	2.58	21.5	3.9474	328.95	0.2142	15.3	NA
2014-08-06	09:47:00	279	26.201	7.37289	53.2966	2.16	22.92	72.69	27.4715	151	0.7	0.6	20.814	0.054	10.425	0.038	2100	0.43	4.93	13.376	103.53	8627.5	9.03	645	8.128
2014-08-06	11:35:00	280	21.419	7.39584	53.2638	0.37	23.2	103.29	38.8408	177.3	2.3	0.3	16.841	0.063	7.816	0.088	NA	0.54	5.68	12.2716	NA	NA	NA	NA	7.937
2014-08-06	12:15:00	281	21.788	7.39657	53.2668	0.57	23.35	79.53	30.026	169.8	0.7	0.2	17.954	0.019	8.583	0.04	1083.14	0.32	4.35	15.8594	47.1166	3926.38	3.46605	247.575	7.967
2014-08-06	12:45:00	282	30.732	7.3288	53.322	1.17	23.34	74.84	28.3479	161	0.8	0.2	19.635	0.005	9.67	0.235	1170	0.46	5.92	15.0145	69.264	5772	5.382	384.429	7.902
2014-08-06	13:15:00	283	37.898	7.22392	53.3304	3.37	23.23	86.79	33.2248	135.8	0.6	0.2	21.307	0.045	10.569	0.162	585.54	0.29	4.59	18.4655	26.8763	2239.69	1.69807	121.29	NA
2014-08-06	13:45:00	284	45.171	7.11477	53.3323	9.75	23.16	136.74	54.2381	102.8	0.5	0.4	22.346	0.077	10.58	0.051	138.1	0.18	3.13	20.287	4.32253	360.211	0.24858	17.7557	7.415
2014-08-06	14:09:00	285	51.077	7.02734	53.323	18.77	23.05	227.06	94.6857	63.6	0.6	1.7	20.771	0.014	8.956	0.211	120.33	0.22	2.95	15.6439	3.54974	295.811	0.264726	18.909	NA
2014-08-07	07:30:00	286	56.487	6.98525	53.3572	24.28	22.48	256.98	109.49	51.4	3.8	3.2	17.729	0.014	6.998	0.014	57.52	0.17	2.35	16.1275	1.35172	112.643	0.097784	6.98457	NA
2014-08-07	08:00:00	287	66.175	6.91826	53.4336	27.89	22.79	261.29	114.319	31.1	7.3	3.5	14.674	0.104	5.707	0.17	41.16	0.14	1.88	15.6667	0.773808	64.484	0.057624	4.116	NA
2014-08-07	08:30:00	288	77.616	6.80777	53.4992	29.09	22.51	274.3	120.241	21.3	7.5	2.6	13.558	0.095	5.695	0.112	35.22	0.31	3.96	14.9032	1.39471	116.226	0.109182	7.79871	NA
2014-08-07	09:00:00	289	88.802	6.67452	53.5609	29.81	22.52	272.59	120.013	15.1	8.5	2.2	12.701	0.003	5.387	0.127	23.98	0.32	3.4	12.3958	0.81532	67.9433	0.076736	5.48114	NA
2014-08-07	09:18:00	290	94.188	6.59065	53.575	31.05	22.17	297.91	131.279	6.1	3.2	1	12.208	0.062	6.431	0.092	55.81	0.25	2.34	10.92	1.30595	108.829	0.139525	9.96607	NA

## Sheet: 2020_Transect
Date	Time	Sample ID	Ems-km	Longitude	Latitude	Salinity	Temperature_°C	Optode-Oxygen_µmol/l	Oxygen-Saturation_%	no3_umol/L	nh4_umol/L	no2_umol/L	ẟ15N-NO3_‰	sd: ẟ15N-NO3_‰	ẟ18O-NO3_‰	sd: ẟ18O-NO3_‰	SPM_mg/L	N_%	Corg_%	C/N	C_mg/L	C_umol/L	N_mg/L	N_umol/L	ẟ15N-SPM_‰	N2O_ppm	N2O_nmol/L	saturation -N2O_%	FBS-N2O_umolm2d
2020-06-11 06:00:00	06:00:00	700	55.614	53.3503	6.98917	24.1479	16.5237	214.984	81.6782	48.9	5	0.84	11.9605	0.0776707	5.83147	0.206313	137.92	0.593	4.107	10.5582	5.66437	472.031	0.817866	58.419	7.04	0.417526	11.9611	129.374	9.51064
2020-06-11 06:30:00	06:30:00	701	48.367	53.3245	7.06623	22.0133	16.5706	207.711	77.9746	62.2	5.1	0.83	13.2303	0.1136	5.9431	0.0188762	58.4	0.736	4.602	9.27446	2.68757	223.964	0.429824	30.7017	6.04	0.518632	14.6479	156.95	18.6211
2020-06-11 07:00:00	07:00:00	702	41.5	53.3322	7.16987	18.6405	16.5659	199.983	73.5495	84.6	4.9	0.83	16.0878	0.0912752	6.37473	0.0789487	230.35	0.545	4.748	11.3706	10.937	911.418	1.25541	89.672	4.62	0.619717	17.8221	187.541	29.1901
2020-06-11 07:30:00	07:30:00	703	35.253	53.3241	7.26401	11.03	16.9457	197.21	69.8063	119.5	5.5	0.71	19.6175	0.144809	7.28662	0.318628	219.95	0.542	4.001	11.203	8.8002	733.35	1.19213	85.1521	6.15	0.693728	20.5136	209.939	38.2059
2020-06-11 07:50:00	07:50:00	704	30.638	53.3212	7.33066	5.4188	16.9472	185.909	63.6161	141.8	3	0.38	21.8452	0.325651	8.60059	0.264283	567.9	0.547	4.288	11.3931	24.3516	2029.3	3.10641	221.887	4.51	0.66435	20.237	201.048	36.2768
2020-06-11 08:10:00	08:10:00	705	25.764	53.2972	7.37612	2.05735	17.1133	153.871	51.7745	144.6	13	0.35	23.149	0.330019	9.09024	0.420818	1053.5	0.501	4.309	11.7465	45.3953	3782.94	5.27804	377.002	5.45	0.571209	17.6146	172.862	26.6387
2020-06-11 08:30:00	08:30:00	706	21.048	53.2666	7.39633	1.3193	17.2728	127.36	42.8059	141.1	1.4	0.28	23.5629	0.138929	9.54517	0.521386	536.5	0.501	3.589	11.2236	19.255	1604.58	2.68786	191.99	4.65	0.525088	16.1694	158.904	21.6018
2020-06-11 08:50:00	08:50:00	707	17.38	53.2324	7.41055	0.936	17.2996	103.316	34.6637	137.4	1.6	0.26	23.9079	0.31023	9.62932	0.36509	1127.57	0.547	4.302	11.4589	48.5081	4042.34	6.16782	440.558	4.83	0.452837	13.9603	137.039	13.6108
2020-06-11 09:10:00	09:10:00	708	12.71	53.2011	7.41056	0.6655	17.4948	88.3001	29.6979	139.3	0.5	0.34	24.9446	0.494916	10.7996	0.547895	1114.88	0.526	3.914	11.3118	43.6362	3636.35	5.86424	418.874	6.03	0.466407	14.3059	141.146	15.1211
2020-06-11 09:30:00	09:30:00	709	7.869	53.1733	7.37341	0.5599	17.5514	75.9198	25.5478	148.5	1.8	0.75	24.1446	0.0640577	10.182	0.0988181	1608.33	0.451466	4.629	11.7307	74.4497	6204.15	7.26108	518.649	6.11	0.672653	20.6047	203.561	38.0652
2020-06-11 09:50:00	09:50:00	710	5.557	53.138	7.36839	0.5573	17.504	87.6883	29.4786	160.2	1.5	0.5	21.5932	0.239607	8.66452	0.13362	867.33	0.572365	4.434	11.5649	38.4576	3204.8	4.96431	354.594	5	0.95897	29.4218	290.207	69.9397
2020-06-11 10:10:00	10:10:00	711	0.728	53.1092	7.36631	0.54925	17.6493	135.337	45.632	166.3	2.3	0.78	19.0921	0.152558	7.58189	0.371477	1070.22	0.554658	4.57	11.5945	48.9092	4075.76	5.93607	424.005	6.07	1.31873	40.2664	399.08	109.856
2020-06-12 13:20:00	13:20:00	716	105.265	53.6117	6.44833	32.3071	15.5784	236.374	92.5983	3.6	4.1	0.27	14.2274	0.0141451	14.5828	0.57786	3.91	2.33041	11.228	6.55733	0.439222	36.6018	0.0911619	6.51157	5.15	0.342951	9.47345	103.643	1.70647
2020-06-12 13:40:00	13:40:00	717	99.338	53.6104	6.5461	31.9217	15.8013	238.608	93.6712	3.7	3.8	0.31	15.2621	0.196448	16.0143	0.58659	5.88	1.71103	9.199	7.30533	0.540752	45.0627	0.100581	7.18433	5.77	0.34401	9.45263	103.963	1.85764
2020-06-12 14:00:00	14:00:00	718	92.434	53.5767	6.6288	31.3974	16.0676	240.65	94.6732	4.9	10.2	0.52	13.735	0.184833	11.4965	0.171573	11.2	1.17998	6.868	8.69155	0.769216	64.1013	0.132158	9.43988	3.85	0.351099	9.59022	106.106	2.86524
2020-06-12 14:20:00	14:20:00	719	85.537	53.5407	6.70916	30.7376	16.3239	229.755	90.4852	6.7	6.4	0.62	13.8431	0.0738473	9.24913	0.361067	17.21	1.07569	6.854	9.00714	1.17969	98.3079	0.185145	13.2246	4.15	0.353497	9.60871	106.83	3.21186
2020-06-12 14:40:00	14:40:00	720	79.298	53.506	6.78978	30.2615	16.4674	227.264	89.5007	8.6	5.6	0.67	10.6137	0.00785488	7.01543	0.160495	17.26	1.32292	7.617	9.02468	1.31493	109.578	0.228377	16.3127	4.44	0.358153	9.71424	108.237	3.88026
2020-06-12 15:00:00	15:00:00	721	72.65	53.4663	6.85741	29.6385	16.8577	228.168	90.2116	12.6	6.9	0.8	10.6609	0.106148	5.2311	0.0342508	14.91	1.19106	6.922	8.87802	1.03173	85.9772	0.177528	12.6806	7.95	0.360578	9.68833	108.97	4.22931
2020-06-12 15:20:00	15:20:00	722	67.025	53.4353	6.91192	29.1123	17.1684	228.667	90.6748	15.5	7.9	0.92	11.0823	0.136934	5.66164	0.191584	19.65	0.956959	5.856	9.91932	1.15093	95.9108	0.188079	13.4342	8.79	0.365651	9.75313	110.504	4.95655
2020-06-12 15:40:00	15:40:00	723	61.844	53.4004	6.94855	28.5642	16.88	227.306	89.3287	21.1	6	0.88	11.5882	0.136043	6.03592	0.697689	19.69	0.911612	6.027	9.31511	1.18686	98.9046	0.179517	12.8227	7.4	0.364416	9.84028	110.13	4.80524
2020-06-12 16:00:00	16:00:00	724	56.912	53.3626	6.97788	27.6103	16.9854	226.183	88.5612	28	6.7	0.89	11.5433	0.0913662	5.69511	0.261748	27.29	0.936706	6.55	9.78194	1.78721	148.935	0.255587	18.2562	7.87	0.377635	10.2138	114.125	6.7324
2020-06-12 16:20:00	16:20:00	725	51.793	53.3291	7.01639	25.299	17.7285	223.289	87.4904	41	6.3	0.93	11.9571	0.0734101	5.37537	0.0381216	34.13	0.783472	5.155	10.2319	1.75962	146.635	0.267433	19.1024	7.21	0.410107	10.9609	123.938	11.5033
2020-06-12 16:40:00	16:40:00	726	48.124	53.3254	7.07176	24.2489	17.5121	220.468	85.4772	51.9	6.1	0.96	12.4901	0.207691	5.11583	0.462889	66.14	0.71433	5.064	10.8807	3.34933	279.111	0.472458	33.747	6.64	0.440978	11.9349	133.268	16.1081
2020-06-12 17:00:00	17:00:00	727	44.834	53.3313	7.11939	21.2697	18.6913	217.964	84.954	67.5	6.9	0.92	14.3911	0.284414	5.66451	0.0351741	118.6	0.692899	5.311	12.0104	6.29885	524.904	0.821778	58.6985	6.62	0.504331	13.3474	152.414	25.606
2020-06-12 17:20:00	17:20:00	728	41.5	53.3323	7.16588	20.7922	17.3953	209.162	79.2411	76.6	6.4	1.03	15.7269	0.00338454	5.75437	0.156448	51.94	0.70387	4.707	11.2898	2.44495	203.746	0.36561	26.115	5.2	NA	NA	NA	NA
2020-06-11	NA	712	-9.013	53.0633	7.28322	0	NA	NA	NA	174.8	2.2	0.48	16.6453	0.0591505	6.33363	0.620944	408.26	0.622438	5.075	11.6048	20.7192	1726.6	2.54117	181.512	4.53	NA	NA	NA	NA
2020-06-11	NA	713	-13.783	53.0316	7.31411	0	NA	NA	NA	181.7	6.1	1.16	14.6414	0.0862561	5.55477	0.0593204	19.73	1.14152	6.954	9.36925	1.37183	114.32	0.225191	16.0851	NA	NA	NA	NA	NA
