# Supplementary material for: Suspended Particulate Matter drives the spatial segregation ofnitrogen turnover along the hyper-turbid Ems estuary
Source: Copernicus journal article supplement (doi:10.5194/bg-2021-321), 2021-12-02
Supplement: Supplementary file 1 [file bg-2021-321-supplement.zip]

1 Supplement Material for:

2 **Suspended Particular Matter drives the spatial segregation of**  
3 **nitrogen turnover along the hyper-turbid Ems estuary**

4 **S1: Oxygen vertical profiles**

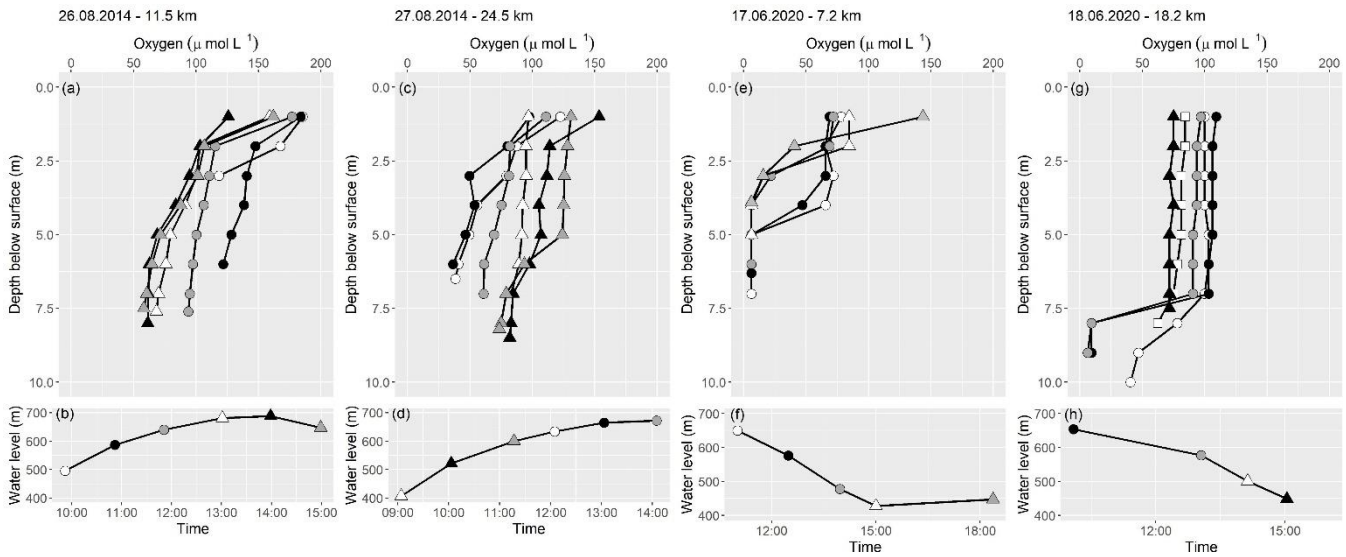

5  
6 **Figure S1: Vertical profiles of oxygen concentration in 2014 and 2020 at different stations along the Tidal River and Dollard Reach: a)**  
7 **vertical profile measured in 2014 at a station at stream kilometer 11.5, with b) the water levels over time at the station, c) vertical profile**  
8 **measured in 2014 at a station at stream kilometer 24.5, with d) the water levels over time at the station, e) vertical profile measured in**  
9 **2020 at a station at stream kilometer 7.2, with f) the water levels over time at the station, g) vertical profile measured in 2020 at a station**  
10 **at stream kilometer 18.2, with h) the water levels over time at the station**

11 *The lowest concentration in bottom water in 2014 was 58  $\mu\text{mol L}^{-1}$  at stream km 11.5, and 36  $\mu\text{mol L}^{-1}$  at km 24. In 2020, oxygen*  
12 *concentration was low in surface water at stream km 7.2, and anoxia occurred in bottom water over a full tidal cycle. Downstream, at*  
13 *km 18.2,  $\text{O}_2$  concentration decreased 6 m below the surface, and anoxic conditions were reached at low water levels*

## 14 S2: Plot of $\delta^{18}\text{O}-\text{NO}_3^-$ vs $\delta^{15}\text{N}-\text{NO}_3^-$ in the Tidal River of the Ems estuary

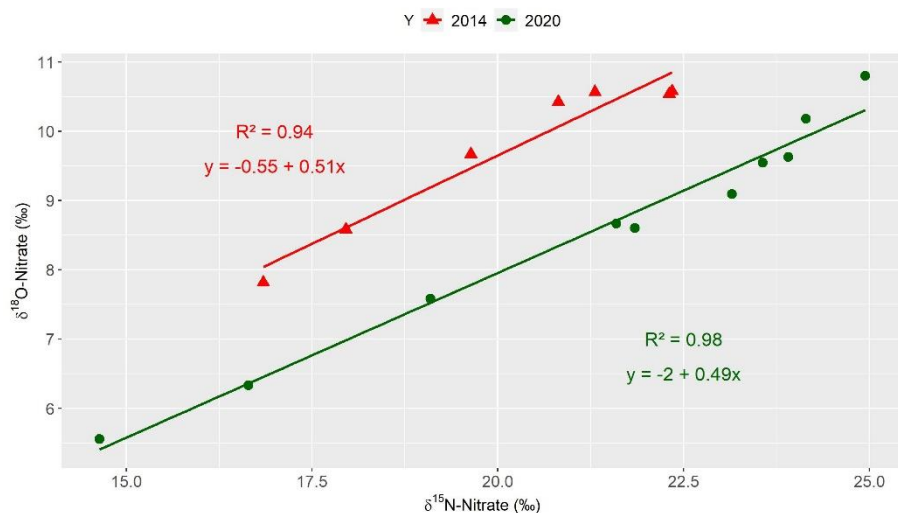

15  
16 **Figure S2: Plot of  $\delta^{18}\text{O}-\text{NO}_3^-$  vs  $\delta^{15}\text{N}-\text{NO}_3^-$  in the Tidal River of the Ems estuary in 2014 and 2020 with regression line, coefficient of**  
17 **determination and linear regression equation. Point shapes and colors mark stream kilometer of each sampling station.**

## 18 S3: Open-system Mapping approach

### 19 S3.1 Explanation and exemplary application

20 We used a mapping approach inspired by Lewicka-Szczebak et al. (2017) using open-system approach for calculations of  
21 isotope effects. In an open-system approach the isotope effect can be described as the slope of the linear relationship between  
22 isotope values of nitrogen and fraction  $f$  (Chapter 2.8) (Sigman et al. 2009). The remaining fraction of substrate  $f$  is determined  
23 by  $f = ([C]/[C]_{\text{initial}})$ . We used our calculated mixing values (Chapter 2.7) as initial concentration and isotope values. In  
24 following, we explain our procedure in detail using a sample (ID: 702, km 41.50, 2020) as an example.

- 25 1. We calculated nitrate mixing concentration and the theoretical isotope value of samples following conservative  
26 mixing between two endmembers (Liss 1976). For our example we derived:

$$27 \quad s = \frac{(32.31 - 18.64)}{(32.31 - 0)} = 0.423 \quad (1)$$

$$28 \quad C_{\text{Mix}} = s \times C_R + (1 - s)C_M = 0.423 \times 181.70 \mu\text{mol L}^{-1} + (1 - 0.423) \times 3.60 \mu\text{mol L}^{-1} = 78.94 \mu\text{mol L}^{-1} \quad (2)$$

$$29 \quad \delta_{\text{Mix}} = \frac{s \times C_R \times \delta_R + (1 - s) \times C_M \times \delta_M}{C_{\text{Mix}}} = \delta_{\text{Mix}} = \frac{0.423 \times 181.70 \mu\text{mol L}^{-1} \times 14.64 \text{‰} + (1 - 0.423) \times 3.60 \mu\text{mol L}^{-1} \times 14.23 \text{‰}}{78.94 \mu\text{mol L}^{-1}} = 14.62 \text{‰} \quad (3)$$

30

- 31 2. We use  $\delta^{15}\text{N}-\text{NO}_3^-_{\text{MIX}}$  as initial isotope value and  $c(\text{NO}_3^-)_{\text{MIX}}$ . The remaining fraction for these values is  $f=1$ , since no  
32 nitrate is converted during pure mixing processes. Following figure is derived for our example:

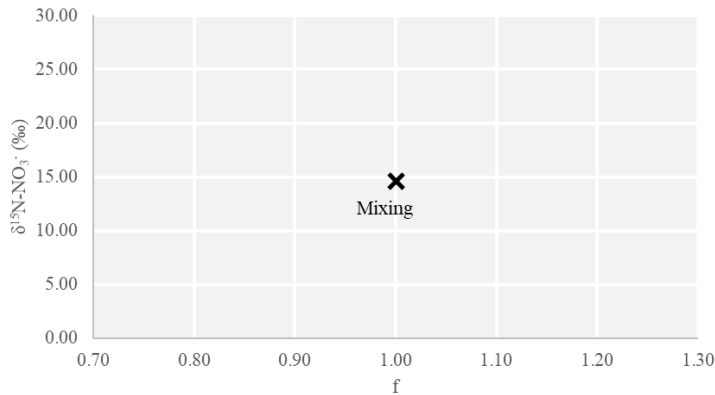

33

34 **Figure S1: Calculates mixing  $\delta^{15}\text{N-NO}_3^-$  versus the remaining fraction of nitrate for the example sample**

35

36 3. We know that nitrogen isotopes ratios change along a specific isotope effect. We determined following relevant  
 37 isotope effects for the Ems estuary:  $^{15}\epsilon_{\text{DENIT}} = -26 \text{ ‰}$ ,  $^{15}\epsilon_{\text{REMIN}} = -1.2 \text{ ‰}$ . As long as ammonium concentration is low,  
 38 we applied this  $^{15}\epsilon_{\text{REMIN}}$  value for nitrification with prior remineralisation. As soon as, ammonium and nitrite  
 39 concentrations increased, we assume that remineralisation no longer determines the overall isotope effect of  
 40 nitrification. We expect a combined influence of ammonium oxidation with an isotope effect  $^{15}\epsilon = -14$  to  $-41 \text{ ‰}$   
 41 (Mariotti et al. 1981; Casciotti et al. 2003; Santoro and Casciotti 2011) and nitrite oxidation with  $^{15}\epsilon = +9$  to  $+20 \text{ ‰}$   
 42 (Casciotti 2009; Buchwald and Casciotti 2010; Jacob et al. 2017) that leads to an assumed isotope effect of  $^{15}\epsilon_{\text{NITRI}} =$   
 $-10 \text{ ‰}$  (Sanders unpublished data).

43

In our example sample, ammonium and nitrite concentration already increased, so we used  $-10 \text{ ‰}$  as slope for our  
 44 nitrification line and  $-26 \text{ ‰}$  for the denitrification line. Which leads to the following figure.

45

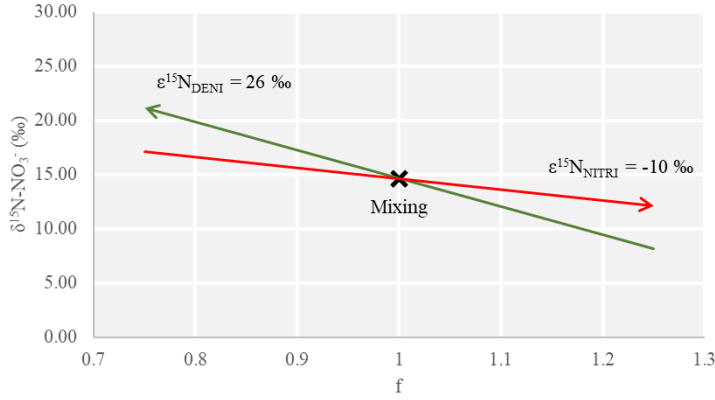

**Figure S2: Calculated mixing  $\delta^{15}\text{N-NO}_3^-$  versus the remaining fraction of nitrate for the example sample. The red line indicates the isotope effect of nitrification with  $\epsilon^{15}\text{N}_{\text{NITRI}} = -10 \text{ ‰}$  with the mixing sample as intersect. The green lines indicates the isotope effect of denitrification with  $\epsilon^{15}\text{N}_{\text{DENI}} = 26 \text{ ‰}$  with the mixing sample as intersect.**

We can describe the linear equations for both processes ( $\text{EQ}_{\text{DENI}, \text{mix}}$  and  $\text{EQ}_{\text{NITRI}, \text{mix}}$ ) using the isotope effect as slope and the calculated mixing value as intersect. Leading to following equations:

$$\text{EQ}_{\text{DENI}, \text{mix}}:$$

$$\delta^{15}\text{N}_{\text{mix}, \text{DENI}} = m_{\text{DENI}} \times f + b_{\text{DENI}, \text{mix}} \rightarrow b_{\text{DENI}, \text{mix}} = \delta^{15}\text{N}_{\text{mix}, \text{DENI}} - m_{\text{DENI}} \times f = 14.64 \text{ ‰} + 26 \times 1 = 40.64 \quad (4)$$

$$\text{EQ}_{\text{NITRI}, \text{mix}}$$

$$\delta^{15}\text{N}_{\text{mix}, \text{NITRI}} = m_{\text{NITRI}} \times f + b_{\text{NITRI}, \text{mix}} \rightarrow b_{\text{NITRI}, \text{mix}} = \delta^{15}\text{N}_{\text{mix}, \text{NITRI}} - m_{\text{NITRI}} \times f = 14.64 \text{ ‰} + 10 \times 1 = 24.64 \quad (5)$$

4. If only one of the processes occurred, the isotope value of our measured sample would lie on one of the regression lines. However, as the following plot shows, this is not the case for our example. The remaining fraction  $f$  of the sample is derived by  $f = ([C]/[C_{\text{initial}}])$ .

$$f = \frac{C_M}{C_{\text{Mix}}} = \frac{84.60 \text{ } \mu\text{mol L}^{-1}}{78.94 \text{ } \mu\text{mol L}^{-1}} = 1.07 \quad (6)$$

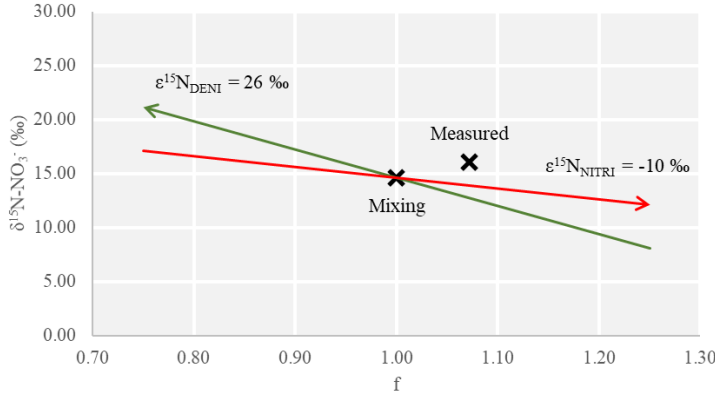

60

61 **Figure S5: Calculated mixing  $\delta^{15}\text{N-NO}_3^-$  and measured  $\delta^{15}\text{N-NO}_3^-$  versus the remaining fraction of nitrate for the example**  
 62 **sample. The red line indicates the isotope effect of nitrification with  $\epsilon^{15}\text{N}_{\text{NITRI}} = -10$  ‰ with the mixing sample as intersect. The green**  
 63 **lines indicates the isotope effect of denitrification with  $\epsilon^{15}\text{N}_{\text{DENI}} = 26$  ‰ with the mixing sample as intersect.**

64 5. After plotting the measured value, we calculate linear equations for each process using the measured values as the  
 65 intersect ( $\text{EQ}_{\text{DENI, meas}}$  and  $\text{EQ}_{\text{NITRI, meas}}$ ). Leading to following results:

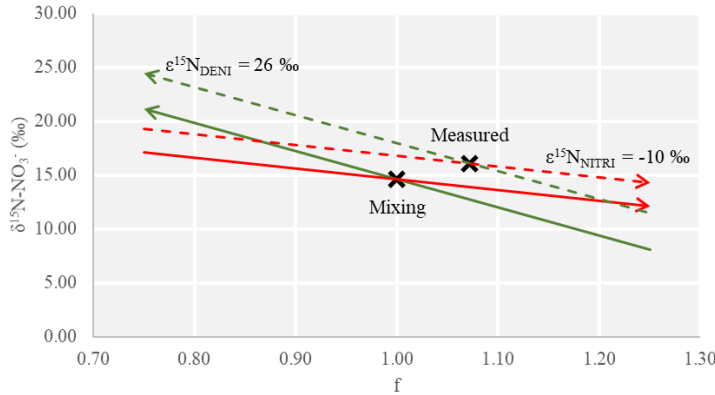

66

67 **Figure S3: Calculated mixing  $\delta^{15}\text{N-NO}_3^-$  and measured  $\delta^{15}\text{N-NO}_3^-$  versus the remaining fraction of nitrate for the example**  
 68 **sample. The red line indicates the isotope effect of nitrification with  $\epsilon^{15}\text{N}_{\text{NITRI}} = -10$  ‰ with the mixing sample as intersect. The green**  
 69 **lines indicates the isotope effect of denitrification with  $\epsilon^{15}\text{N}_{\text{DENI}} = 26$  ‰ with the mixing sample as intersect. The dashed red line indicates the**  
 70 **isotope effect of nitrification with  $\epsilon^{15}\text{N}_{\text{NITRI}} = -10$  ‰ with the measured sample as intersect. The dashed green lines indicates the isotope**  
 71 **effect of denitrification with  $\epsilon^{15}\text{N}_{\text{DENI}} = 26$  ‰ with the measured sample as intersect.**

72

$$\text{EQ}_{\text{DENI, meas}}:$$

$$73 \quad \delta^{15}\text{N}_{\text{meas, DENI}} = m_{\text{DENI}} \times f + b_{\text{DENI, meas}} \rightarrow b_{\text{DENI, meas}} = \delta^{15}\text{N}_{\text{meas, DENI}} - m_{\text{DENI}} \times f = 16.09 \text{ ‰} + 26 \times 1.07 =$$

$$74 \quad 43.95 \quad (7)$$

75

$$\delta^{15}N_{mix, NITRI} = m_{NITRI} \times f + b_{NITRI, meas} \rightarrow b_{NITRI, meas} = \delta^{15}N_{meas, NITRI} - m_{NITRI} \times f = 16.09 \text{‰} + 10 \times 1.07 = 26.80 \quad (8)$$

6. We determine intersects of a linear equation derived by the mixing value as intersect and an equation derived by the measured sample to calculate the amount of nitrate processes via the different pathways. Therefore, two different approaches are possible for this purpose that lead to the same results.

a. Calculating  $f_{DENI}$ : The intersection of EQ<sub>DENI, mix</sub> and EQ<sub>NITRI, meas</sub> leads to  $f_{DENI}$ . The difference between  $f$  and  $f_{DENI}$  results in  $f_{NITRI}$ . To calculate the amount of nitrate consumed/produced via each process, we use the deviation from the initial fractionation.

$$f_{DENI}:$$

$$\delta^{15}N_{DENI} = m_{DENI} \times f_{DENI} + b_{DENI, mix} = m_{NITRI} \times f_{DENI} + b_{NITRI, meas} \quad (9)$$

$$-26 \times f_{DENI} + 40.64 = -10 \times f_{DENI} + 26.80$$

$$f_{DENI} = \frac{40.64 - 26.80}{26 - 10} = 0.86$$

$$f_{NITRI}:$$

$$f_{NITRI} = f - f_{DENI} = 1.07 - 0.86 = 0.21 \quad (10)$$

$$c(NO_3^-)_{DENI}$$

$$C_{DENI} = (f_{ini} - f_{DENI}) \times C_{MIX} = (1 - 0.86) \times 78.94 \mu mol L^{-1} = 10.73 \mu mol L^{-1} \quad (11)$$

$$c(NO_3^-)_{NITRI}$$

$$C_{NITRI} = f_{NITRI} \times C_{MIX} = 0.21 \times 78.94 \mu mol L^{-1} = 16.39 \mu mol L^{-1} \quad (12)$$

94

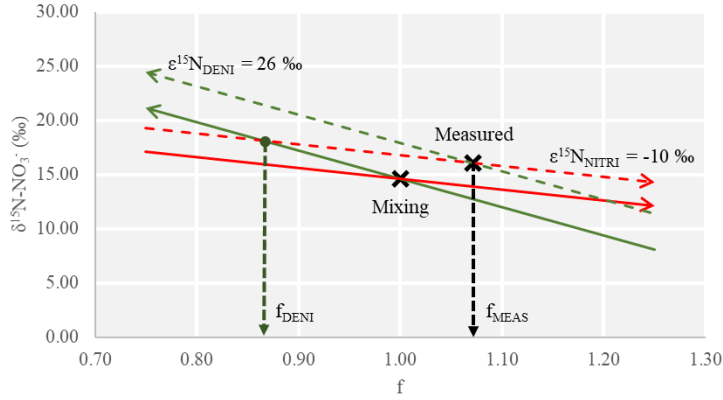

95

96 **Figure S4: Calculated mixing  $\delta^{15}\text{N-NO}_3^-_{\text{mix}}$  and measured  $\delta^{15}\text{N-NO}_3^-_{\text{sample}}$  versus the remaining fraction of nitrate for the example**  
 97 **sample. The red line indicates the isotope effect of nitrification with  $\epsilon^{15}\text{N}_{\text{NITRI}} = -10$  ‰ with the mixing sample as intersect. The green lines**  
 98 **indicates the isotope effect of denitrification with  $\epsilon^{15}\text{N}_{\text{DENI}} = 26$  ‰ with the mixing sample as intersect. The dashed red line indicates the**  
 99 **isotope effect of nitrification with  $\epsilon^{15}\text{N}_{\text{NITRI}} = -10$  ‰ with the measured sample as intersect. The dashed green lines indicates the isotope**  
 100 **effect of denitrification with  $\epsilon^{15}\text{N}_{\text{DENI}} = 26$  ‰ with the measured sample as intersect.**

- 101 b. Calculating  $f_{\text{NITRI}}$ : The intersection of  $\text{EQ}_{\text{REMIN,mix}}$  and  $\text{EQ}_{\text{DENI,meas}}$  leads to  $f_{\text{NITRI}}$ . The difference between  $f$   
 102 and  $f_{\text{NITRI}}$  results in  $f_{\text{DENI}}$ . To calculate the amount of nitrate consumed/produced via each process, we use  
 103 the deviation from the initial fractionation.

104 
$$f_{\text{NITRI}}:$$

105 
$$\delta^{15}\text{N}_{\text{NITRI}} = m_{\text{DENI}} \times f_{\text{NITRI}} + b_{\text{DENI,meas}} = m_{\text{NITRI}} \times f_{\text{NITRI}} + b_{\text{NITRI,mix}} \quad (13)$$

106 
$$-26 \times f_{\text{NITRI}} + 43.95 = -10 \times f_{\text{NITRI}} + 24.63$$

107 
$$f_{\text{NITRI}} = \frac{43.95 - 24.63}{26 - 10} = 1.21$$

108 
$$f_{\text{DENI}}:$$

109 
$$f_{\text{DENI}} = f_{\text{NITRI}} - f = 1.21 - 1.07 = 0.14 \quad (14)$$

110 
$$c(\text{NO}_3^-)_{\text{NITRI}}$$

111 
$$C_{\text{NITRI}} = (f_{\text{NITRI}} - f_{\text{ini}}) \times C_{\text{MIX}} = (1.21 - 1) \times 78.94 \mu\text{mol L}^{-1} = 16.39 \mu\text{mol L}^{-1} \quad (15)$$

112 
$$c(\text{NO}_3^-)_{\text{DENI}}$$

113 
$$C_{\text{DENI}} = f_{\text{DENI}} \times C_{\text{MIX}} = 0.14 \times 78.94 \mu\text{mol L}^{-1} = 10.73 \mu\text{mol L}^{-1} \quad (16)$$

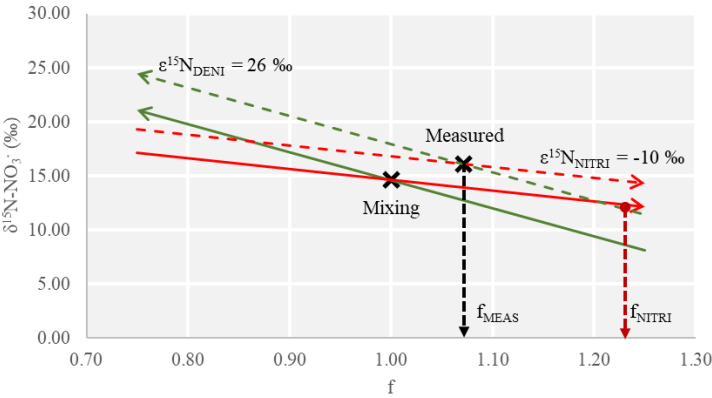

114

115 **Figure S5:** Calculated mixing  $\delta^{15}\text{N-NO}_3^-_{\text{mix}}$  and measured  $\delta^{15}\text{N-NO}_3^-_{\text{sample}}$  versus the remaining fraction of nitrate for the example  
116 sample. The red line indicates the isotope effect of nitrification with  $\epsilon^{15}\text{N}_{\text{NITRI}} = -10 \text{ ‰}$  with the mixing sample as intersect. The green  
117 lines indicates the isotope effect of denitrification with  $\epsilon^{15}\text{N}_{\text{DENI}} = 26 \text{ ‰}$  with the mixing sample as intersect. The dashed red line  
118 indicates the isotope effect of nitrification with  $\epsilon^{15}\text{N}_{\text{NITRI}} = -10 \text{ ‰}$  with the measured sample as intersect. The dashed green lines  
119 indicates the isotope effect of denitrification with  $\epsilon^{15}\text{N}_{\text{DENI}} = 26 \text{ ‰}$  with the measured sample as intersect.

120 **S3.2 Results**

121 **Table 1:** Measured and calculated mixing values for samples in zone 2 in 2014 used for the open-system mapping approach

| 2014  | MEAS                                         |                                   | MIX                                          |                                   |
|-------|----------------------------------------------|-----------------------------------|----------------------------------------------|-----------------------------------|
| km    | $c(\text{NO}_3^-)$<br>$\mu\text{mol L}^{-1}$ | $\delta^{15}\text{N-NO}_3^-$<br>‰ | $c(\text{NO}_3^-)$<br>$\mu\text{mol L}^{-1}$ | $\delta^{15}\text{N-NO}_3^-$<br>‰ |
| 26.20 | 151.00                                       | 20.81                             | 167.32                                       | 16.83                             |
| 30.73 | 161.00                                       | 19.64                             | 172.84                                       | 16.84                             |
| 66.18 | 31.10                                        | 14.67                             | 23.86                                        | 16.04                             |
| 77.62 | 21.30                                        | 13.56                             | 17.17                                        | 15.68                             |
| 87.53 | 23.30                                        | 14.25                             | 18.40                                        | 15.77                             |
| 88.80 | 15.10                                        | 12.70                             | 13.16                                        | 15.29                             |

122

123



124 **Table 2: Results of the open-system mapping approach for samples in zone 2 in 2014**

| 2014  |                  |                   | DENI   |                  |                   | NITRI  |                  |                   | DENI |                                                          | NITRI |                                                          |
|-------|------------------|-------------------|--------|------------------|-------------------|--------|------------------|-------------------|------|----------------------------------------------------------|-------|----------------------------------------------------------|
| Km    | F <sub>mix</sub> | F <sub>Meas</sub> | m      | b <sub>mix</sub> | b <sub>meas</sub> | m      | b <sub>mix</sub> | b <sub>meas</sub> | f    | c(NO <sub>3</sub> <sup>-</sup> )<br>μmol L <sup>-1</sup> | f     | c(NO <sub>3</sub> <sup>-</sup> )<br>μmol L <sup>-1</sup> |
| 26.20 | 1.00             | 0.90              | -26.00 | 42.83            | 44.28             | -1.20  | 18.03            | 21.90             | 0.84 | 26.07                                                    | 1.06  | 9.75                                                     |
| 30.73 | 1.00             | 0.93              | -26.00 | 42.84            | 43.85             | -1.20  | 18.04            | 20.75             | 0.89 | 18.92                                                    | 1.04  | 7.08                                                     |
| 66.18 | 1.00             | 1.30              | -26.00 | 42.04            | 48.56             | -10.00 | 26.04            | 27.71             | 0.90 | 2.48                                                     | 1.41  | 9.72                                                     |
| 77.62 | 1.00             | 1.24              | -26.00 | 41.68            | 45.81             | -10.00 | 25.68            | 25.96             | 0.98 | 0.30                                                     | 1.26  | 4.43                                                     |
| 87.53 | 1.00             | 1.27              | -26.00 | 41.77            | 47.18             | -10.00 | 25.77            | 26.92             | 0.93 | 1.32                                                     | 1.34  | 6.23                                                     |
| 88.80 | 1.00             | 1.15              | -26.00 | 41.29            | 42.54             | -10.00 | 25.29            | 24.18             | 1.07 | -0.91                                                    | 1.08  | 1.03                                                     |

125

126 **Table 3: Measured and calculated mixing values for samples in zone 2 in 2020 used for the open-system mapping approach**

| 2020  | MEAS                                                     |                                                     | MIX                                                      |                                                     |
|-------|----------------------------------------------------------|-----------------------------------------------------|----------------------------------------------------------|-----------------------------------------------------|
| km    | c(NO <sub>3</sub> <sup>-</sup> )<br>μmol L <sup>-1</sup> | δ <sup>15</sup> N-NO <sub>3</sub> <sup>-</sup><br>‰ | c(NO <sub>3</sub> <sup>-</sup> )<br>μmol L <sup>-1</sup> | δ <sup>15</sup> N-NO <sub>3</sub> <sup>-</sup><br>‰ |
| 30.64 | 141.80                                                   | 21.85                                               | 151.83                                                   | 14.64                                               |
| 35.25 | 119.50                                                   | 19.62                                               | 120.89                                                   | 14.64                                               |
| 41.50 | 84.60                                                    | 16.09                                               | 78.94                                                    | 14.63                                               |
| 41.50 | 76.60                                                    | 15.73                                               | 67.08                                                    | 14.63                                               |
| 44.83 | 67.50                                                    | 14.39                                               | 64.45                                                    | 14.63                                               |
| 48.12 | 51.90                                                    | 12.49                                               | 48.02                                                    | 14.62                                               |
| 48.37 | 62.20                                                    | 13.23                                               | 60.35                                                    | 14.62                                               |
| 55.61 | 48.90                                                    | 11.96                                               | 48.58                                                    | 14.62                                               |

127

128

129 **Table 4: Results of the open-system mapping approach for samples in zone 2 in 2020**

| 2020  |                  |                   | DENI   |                    |                   | NITRI  |                    |                   | DENI |                                                          | NITRI |                                                          |
|-------|------------------|-------------------|--------|--------------------|-------------------|--------|--------------------|-------------------|------|----------------------------------------------------------|-------|----------------------------------------------------------|
| Km    | F <sub>mix</sub> | F <sub>Meas</sub> | m      | b <sub>mix</sub> , | b <sub>meas</sub> | m      | b <sub>mix</sub> , | b <sub>meas</sub> | f    | c(NO <sub>3</sub> <sup>-</sup> )<br>μmol L <sup>-1</sup> | f     | c(NO <sub>3</sub> <sup>-</sup> )<br>μmol L <sup>-1</sup> |
| 30.64 | 1.00             | 0.93              | -26.00 | 40.64              | 46.13             | -10.00 | 24.64              | 31.18             | 0.59 | 62.11                                                    | 1.34  | 52.08                                                    |
| 35.25 | 1.00             | 0.99              | -26.00 | 40.64              | 45.32             | -10.00 | 24.64              | 29.50             | 0.70 | 36.76                                                    | 1.29  | 35.36                                                    |
| 41.50 | 1.00             | 1.07              | -26.00 | 40.63              | 43.95             | -10.00 | 24.63              | 26.80             | 0.86 | 10.727                                                   | 1.208 | 16.387                                                   |
| 41.50 | 1.00             | 1.14              | -26.00 | 40.63              | 45.42             | -10.00 | 24.63              | 27.15             | 0.84 | 10.56                                                    | 1.30  | 20.08                                                    |
| 44.83 | 1.00             | 1.05              | -26.00 | 40.63              | 41.62             | -10.00 | 24.63              | 24.86             | 0.99 | 0.96                                                     | 1.06  | 4.02                                                     |
| 48.12 | 1.00             | 1.08              | -26.00 | 40.62              | 40.59             | -10.00 | 24.62              | 23.30             | 1.08 | -3.96                                                    | 1.00  | -0.09                                                    |
| 48.37 | 1.00             | 1.03              | -26.00 | 40.62              | 40.03             | -10.00 | 24.62              | 23.54             | 1.07 | -4.10                                                    | 0.96  | -2.25                                                    |
| 55.61 | 1.00             | 1.01              | -26.00 | 40.62              | 38.13             | -10.00 | 24.62              | 22.03             | 1.16 | -7.87                                                    | 0.84  | -7.55                                                    |

130

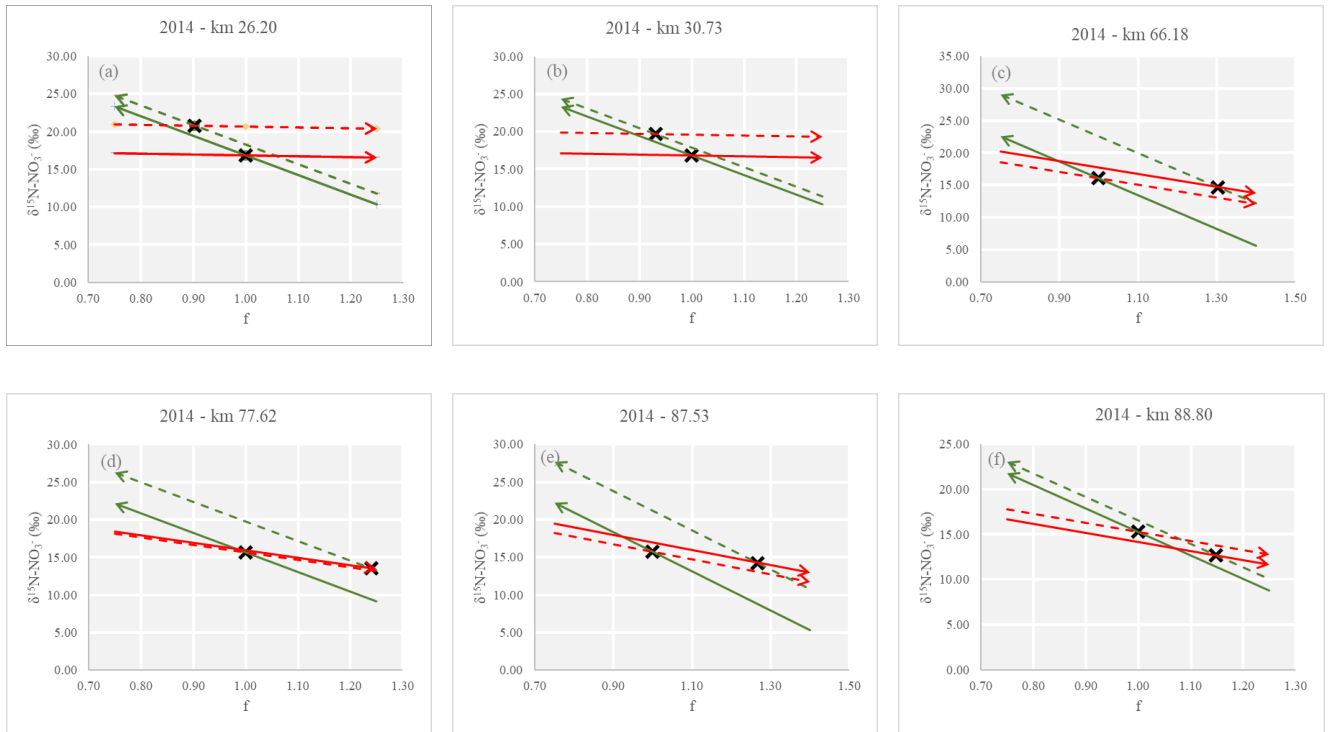

**Figure S6: Plots derived by our open-system mapping approach for samples in 2014 (a) at stream kilometer 26.20, (b) at stream kilometer 30.73 (c) at stream kilometer 66.18, (d) at stream kilometer 77.62, (e) at stream kilometer 87.53, (f) at stream kilometer 88.80. Line color and arrow direction indicate the turnover-process. Green lines with arrows oriented upwards to the left are denitrification lines. Red lines with arrows oriented downwards to the right are nitrification lines. Straight lines indicate linear regression with mixing values as intercept and dashed lines linear regressions with the measured samples as intersect.**

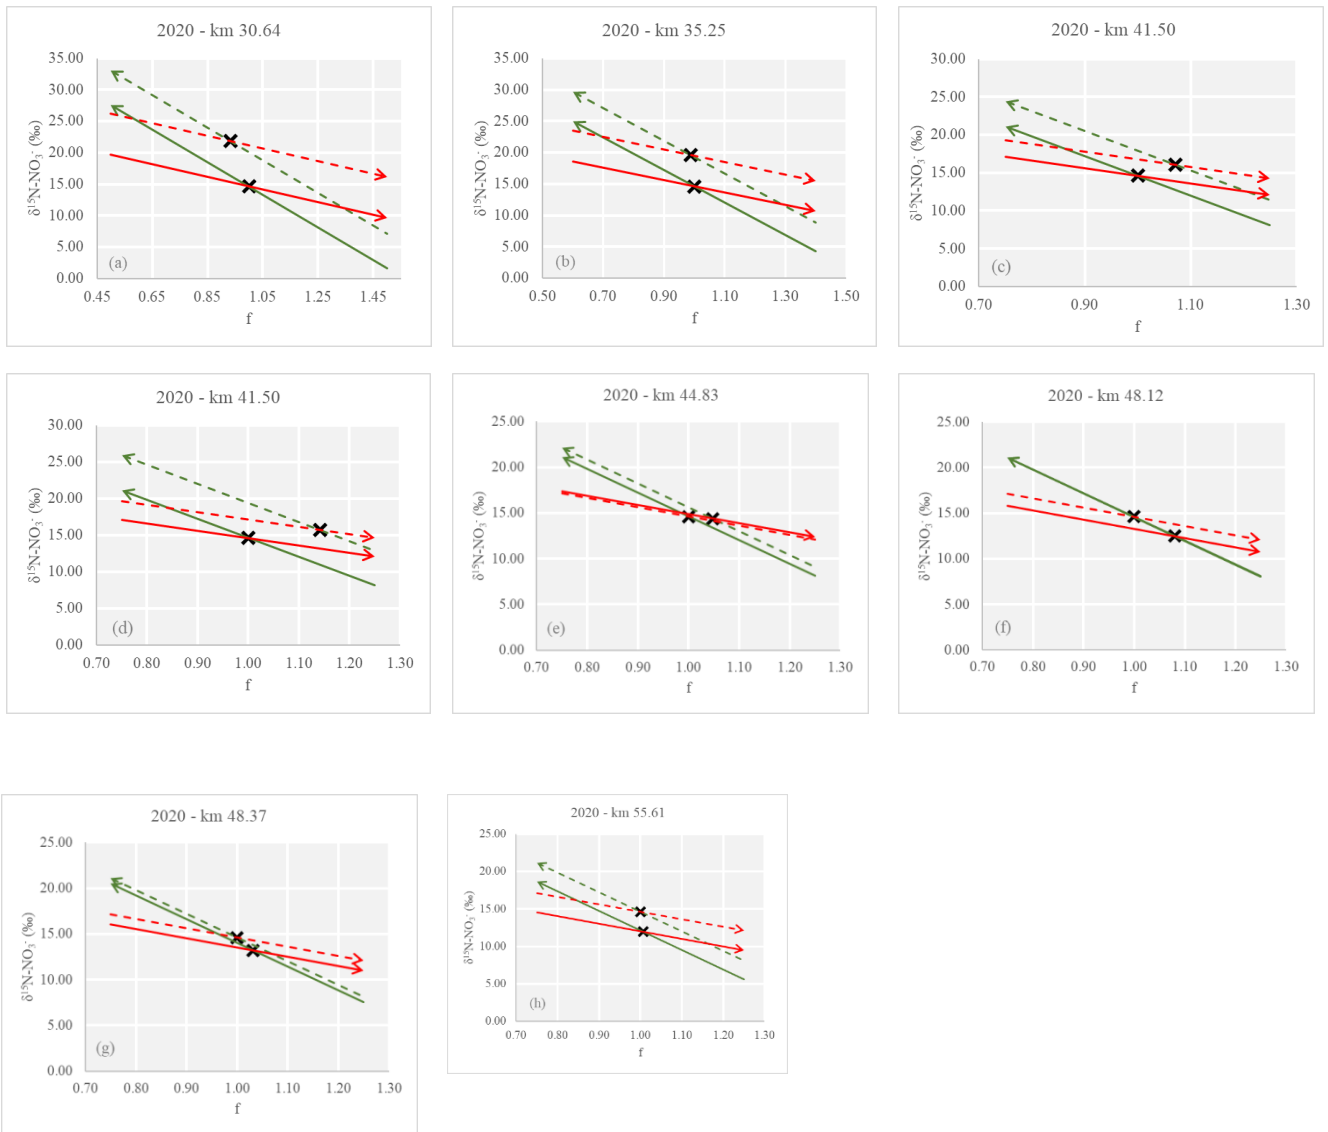

137 **Figure S7: Plots derived by our open-system mapping approach for samples in 2020 (a) at stream kilometer 30.64, (b) at stream kilometer**  
 138 **35.25, (c) at stream kilometer 41.50, (d) at stream kilometer 41.50, (e) at stream kilometer 44.83, (f) at stream kilometer 48.12, (g) at**  
 139 **stream kilometer 48.37, (h) at stream kilometer 55.61. Line color and arrow direction indicate the turnover-process. Green lines with**  
 140 **arrows oriented upwards to the left are denitrification lines. Red lines with arrows oriented downwards to the right are nitrification lines.**  
 141 **Straight lines indicate linear regression with mixing values as intercept and dashed lines linear regressions with the measured samples**  
 142 **as intersect.**

143 **S4: Chlorophyll a concentration in the Outer Reaches**

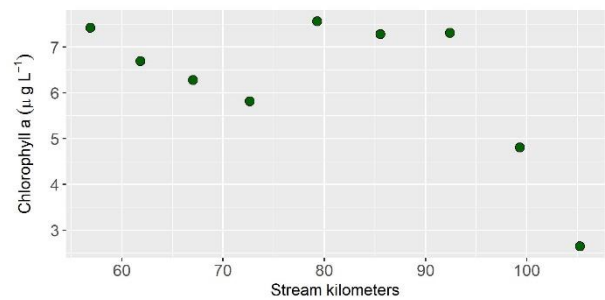

144

145 **Figure S9: Chlorophyll a concentration in the Outer Reaches /zone 3 during our cruise in 2020. For chlorophyll a, water was filtered**  
146 **through combusted, pre-weighted GF/F Filters (4 h, 450 °C) and stored frozen for later analysis in our laboratory. The slight**  
147 **chlorophyll maximum supports our assumption of nitrate uptake due to ongoing primary production in the Outer Reaches.**
